# Supplementary material for: An MCMC Bayesian full moment tensor inversion constrained by first-motion polarities and double couple percent
Source: Copernicus journal article supplement (doi:10.5194/se-2019-191), 2020-01-27
Supplement: Supplementary file [file se-2019-191-RC1-supplement.pdf]

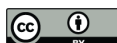

# An MCMC Bayesian full moment tensor inversion constrained by first-motion polarities and double couple percent

Mehrdad Pakzad<sup>1</sup>, Mahnaz Khalili<sup>2</sup>, Shaghayegh Vahidravesh<sup>2</sup>

<sup>1</sup>Institute of Geophysics, University of Tehran, Tehran, 1435944411, Iran

<sup>2</sup>Graduate Student of Geophysics, Institute of Geophysics, University of Tehran, Tehran, 1435944411, Iran

Correspondence to: Mehrdad Pakzad ([pakzad@ut.ac.ir](mailto:pakzad@ut.ac.ir))

**Abstract.** Monte Carlo Markov chain (MCMC) samplings can obtain a set of samples by directed random walk, mapping the posterior probability density of the model parameters in Bayesian framework. We perform earthquake waveform inversion to retrieve focal angles or the elements of moment tensor and source location using a Bayesian MCMC method with the constraints of first-motion polarities and double couple percentage using full Green functions and data covariance matrix. The algorithm tests the compatibility with polarities and also checks the double couple percentage of every site before the time-consuming synthetic seismogram computation for every sample of moment tensor of every trial source position. Other than large earthquakes, the method is especially suitable for weak events ( $M < 4$ ) that their focal mechanisms cannot be well-constrained by polarities or seismograms alone, unless a dense local network is available; something that is generally occasional. Two- and one-station solutions show more agreement with all-station solution if polarity and DC% constraints are employed. In order to examine the validity of the method, two events with the independent focal mechanism solutions are utilized. Furthermore, we also calculate data covariance matrix from pre-event noise and Green function uncertainty to obtain the errors of focal mechanisms.

## 1 Introduction

It should be taken into consideration that most of the time due to lack of recording or noisy content of the records in long epicentral distances, determination of the focal mechanisms of weak events are difficult. Moreover, the signal to noise ratio (SNR) for microseismic events at long periods is low, therefore, small events have to be investigated at high frequencies. Accordingly, more high-frequency velocity models are required. A suite of approaches has been introduced to tackle the issues, some of which utilize a Markov chain Monte Carlo (MCMC) method in Bayesian framework.

Among other methods, two-step method of Šílený et al. (1992) consists of an iteration of a linear inversion step with fixed depth and velocity model and successive perturbation of both inside a set, bounded between two depths and two structural models. Mao et al. (1994) used their method for high frequency data up to 10 Hz. They achieved this by Green's functions calculation for an inhomogeneous medium with detailed structure. Wéber studied low-magnitude earthquakes through a series of papers. His probabilistic procedure solves the nonlinearity problem of using hypocentral location as model parameter. Routinely determined locations are usually not accurate enough in short epicentral distances where the weak events are recorded. A priori hypocenter distribution is given by observed arrival



times, and it is employed in a Bayesian formulation with likelihood function constructed by observed waveforms, then the posterior hypocenter distribution is mapped by octree importance sampling (Lomax and Curtis, 2001). The posterior probability density function (hereafter PPD) of moment tensor rate functions are sampled by a large number of bootstrapped data sets with the rate functions linearly inverted using hypocenters randomly chosen from the posterior hypocentral probability density function (Wéber, 2006). Stähler and Sigloch (2014) proposed a probabilistic framework that samples earthquake depth, moment tensor (MT), and source time function with the neighborhood algorithm. Mustać and Tkalčić (2016) used two chains approach for sampling location and MT parameters. They also treated noise as a free parameter in the inversion. Ito et al. (2016) estimated the probability density functions of fault parameters using MCMC method for the 2004 Sumatra–Andaman earthquake. Gu et al. (2018) applied one Markov chain technique for their waveform-based Bayesian full moment tensor inversion for small earthquakes. They performed source relocation, full moment tensor inversion and uncertainty analysis. In their study, Marginal-then-conditional sampling of the joint distribution was first obtained for any given location and velocity model, then for each sampled location and velocity model they directly sampled MT from its conditional distribution. Wéber (2018) introduced a method called JOWAPO (joint waveform and polarity) inversion. The method constructs a posterior probability density of strike, dip and rake and maps it by octree importance sampling. The PPD consists of a null a priori information and two likelihood functions for polarities and waveforms. For the details about the polarity likelihood refer to Brillinger, 1980; Walsh et al. 2009 and Wéber 2018. Comparing to waveform data, the information content of first-motion polarities of body waves is low, that is why a dense coverage of focal sphere is required for a reliable result. On the other hand, for high frequency weak events, available velocity distributions are usually not detailed enough to model their waveforms and retrieve the focal mechanisms, that is, waveforms can be modelled convincingly just for relatively close stations to receive a quite dependable focal mechanisms solution for near station earthquakes. However, seismic networks are not usually dense enough to make sufficient data available for inversion. Therefore, combining polarity data with near-station records can be helpful. In the case of a small event occurrence and with low number of stations, the objective cannot be more than to retrieve its DC focal mechanism with the uncertainty. Earthquakes source inversion is relevant to the location determination and also velocity models. Uncertainty in both the model parameters (here DC mechanisms), first motion observations and seismic waveform should be merged by an inversion technique. In this regard, the most suitable inversion method is Bayesian sampling producing an ensemble of DC focal mechanisms based on the posterior probability distribution. (Wéber, 2018). As to the constraints, various methods adopted them for retrieving focal mechanisms of weak events in sparse networks. For example, the phase and waveform amplitude can be combined with the first-motion P polarities and average S/P amplitude ratios (Li et al., 2011). The focal mechanisms obtained by a broad set of the first-motion polarities can be constrained by a single-station waveform inversion (Fojtíková and Zahradník, 2014). In this study we perform waveform inversion but constrain it by first motion polarities and DC% for tectonic earthquakes. The method can work with strike, dip and rake and also for the elements of MT as the model parameters; therefore for non-tectonic earthquakes, DC% constrain can be eliminated. Here we describe full moment tensor and location inversion. In the following sections, after a brief introductory overview of the intended methods used in this study, the performed synthetic tests are described. It is preceded with the testing the method on two earthquakes in Switzerland and Iran.

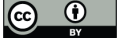

## 2 Method

The PPD is computed using the Bayesian rule to the parameters  $\mathbf{m}$ , that can be strike, dip and rake or elements of MT and  $\mathbf{x}$ , the location; given polarities,  $\mathbf{P}$  and waveforms,  $\mathbf{d}$

$$\sigma(\mathbf{m}, \mathbf{x} | \mathbf{P}, \mathbf{d}) \propto \rho(\mathbf{x}) \rho(\mathbf{m}) L_P(\mathbf{P} | \mathbf{m}, \mathbf{x}) L_d(\mathbf{d} | \mathbf{m}, \mathbf{x}), \quad (1)$$

where,  $\rho(\mathbf{x})$  and  $\rho(\mathbf{m})$  are the prior information about  $\mathbf{x}$  and  $\mathbf{m}$ ;  $L_P(\mathbf{P} | \mathbf{m}, \mathbf{x})$  and  $L_d(\mathbf{d} | \mathbf{m}, \mathbf{x})$  are the likelihood functions for polarities and waveforms. The uniform distribution assumptions are considered for both of the prior probability densities, that is, all trial locations have equal chance before considering data and the boundary values of the coefficients of elementary seismograms are set to -1.5 and 1.5. Unlike Wéber (2018), we only benefit from the reliable polarities as constraints for the inversion, therefore we consider  $L_P(\mathbf{P} | \mathbf{m}, \mathbf{x})$  to be equal to one. The Gaussian model waveform likelihood is given by

$$L_d(\mathbf{d} | \mathbf{m}, \mathbf{x}) \propto \exp\left[-\frac{1}{2} (\mathbf{G}(\mathbf{x})\mathbf{m} - \mathbf{d})^T \mathbf{C}_D^{-1} (\mathbf{G}(\mathbf{x})\mathbf{m} - \mathbf{d})\right], \quad (2)$$

where  $\mathbf{G}(\mathbf{x})$  is the spatial derivative of the Green's function at the source location  $\mathbf{x}$  and  $\mathbf{C}_D = \mathbf{C}_d + \mathbf{C}_T$ , that is, waveform uncertainties and theoretical uncertainties combined by adding the respective covariance operators to obtain the total covariance matrix (Tarantola, 1987).

The inverse problem is linear in  $\mathbf{m}$  and nonlinear in  $\mathbf{x}$ , which results in complex structure of the joint posterior distribution of the model parameters. In their waveform-based Bayesian full moment tensor inversion, Gu et al. (2018) designed an MCMC approach to incorporate variation in  $\mathbf{x}$  into the problem. They first obtain the marginal posterior probability distribution  $\sigma(\mathbf{x}^* | \mathbf{d})$  for any given  $\mathbf{x}$  and use it to calculate the Metropolis acceptance ratio. The adaptive Metropolis method of Haario et al. (2001) is used to draw a new proposal model  $\mathbf{x}$ . Then for each sampled  $\mathbf{x}$ , they directly sample  $\mathbf{m}$  from its analytical covariance matrix. The algorithm is called marginal-then-conditional sampling (Fox & Norton, 2015) that only needs one Markov chain to explore the posterior probability density. Employing polarities in the inversion also makes finding  $\mathbf{m}$  nonlinear. We implement two chains for sampling location and MT parameters. The second chain to sample MT is inside the first one which samples location. The procedure to sample  $\mathbf{x}$  in the first chain is the same as used in Gu et al. (2018), that is a metropolis test which is used to determine whether to accept or reject a trial  $\mathbf{x}$  according to marginal posterior distribution for any sampled  $\mathbf{x}$  without reference to the values of MT; but for the inner sampling of  $\mathbf{m}$ , we explore  $L_d(\mathbf{d} | \mathbf{m}, \mathbf{x}^*)$  in Eq. (2) by Metropolis-Gibbs sampler described by Lomax et al. (2000). They employ Metropolis-Gibbs Sampling algorithm for probabilistic earthquake location in 3D space (NonLinLoc program), here we use it in 6D space to retrieve MT. The procedure explores the PPD by directed walk towards high likelihood regions. The new walk site  $\mathbf{m}_{new}$  is obtained from the current site  $\mathbf{m}_{curr}$ , by adding a vector of arbitrary direction  $d\mathbf{m}$ , with length  $l$ . The new site is accepted, if  $\sigma(\mathbf{m}_{new}, \mathbf{x}^* | \mathbf{d}) \geq \sigma(\mathbf{m}_{curr}, \mathbf{x}^* | \mathbf{d})$ , otherwise the new site is accepted with probability  $\sigma(\mathbf{m}_{new}, \mathbf{x}^* | \mathbf{d}) / \sigma(\mathbf{m}_{curr}, \mathbf{x}^* | \mathbf{d})$ . In order to

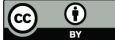

111 achieve a good coverage of PPD, determination of the step size  $l$  is essential. The algorithm does this adaptively in  
 112 stages. In the first stage called the learning stage, the step size is constant and relatively large enough to explore all  
 113 the solution space and to wander towards high likelihood regions. In the equilibration stage, the searching of high  
 114 likelihood regions can continue or these regions may begin to be searched for the optimum point. To achieve that,  $l$  is  
 115 set equal to  $f_s(S_{m1}S_{m2}S_{m3}S_{m4}S_{m5}S_{m6}/N_s)^{1/6}$ , where  $f_s = 16$  is the scaling factor and  $S$  stands for standard  
 116 deviation.  $N_s$  is the number of samples to be accepted during the saving stage. In the final saving stage the step size is  
 117 fixed at its final value from the previous stage and the walk can continue to explore high likelihood regions (Lomax  
 118 et al., 2000). The polarity constraint and arbitrary DC% condition for tectonic earthquakes are applied inside the  
 119 second chain, that is, after sampling MT, the polarity and DC% tests are performed for compliance and if the conditions  
 120 are fulfilled, then the metropolis test is performed, otherwise the sample is rejected.

121 We employ Vackář et al. (2017) method for calculating  $\mathbf{C}_d$ . Data covariance matrix is constructed from pre-event  
 122 noise which allows an automated weighting of the records according to their SNR. In other words, it plays the role of  
 123 automated frequency filter containing noisy frequency ranges in the frequency domain. The noise generation is  
 124 supposed to be a random Gaussian stationary process. Therefore, with additional ergodicity assumption taken into  
 125 account, the covariance function is estimated from a time series autocorrelation. This matrix can be assigned to one  
 126 station by calculating the covariance function from the cross correlations of three components. This way, each station  
 127 have nine matrix blocks. It can also be assumed that noises at distant stations for high frequencies are not correlated,  
 128 so that the off-diagonal blocks in the main covariance matrix have zero values. The other source of error is theoretical.  
 129 Green function uncertainty is mostly related to the random time shifts of the data, accordingly this feature can be  
 130 employed to obtain approximate covariance matrix for  $\mathbf{C}_T$  (Hallo and Gallovič, 2016; Hallo et al., 2017).  $\mathbf{C}_d$  takes  
 131 precedence for weaker earthquakes (with significant uncorrelated noise) that is while  $\mathbf{C}_T$  is dominant for stronger  
 132 (uncorrelated noise free) earthquakes. In the following we apply the method to two earthquakes with  $M_w$  3.7 and 3.8;  
 133 for both,  $\mathbf{C}_d$  is dominant.

134 The computational cost of running the code on a 2.60 GHz Dual-Core CPU, 4G memory PC, for 1000 iterations in  
 135 location chain and  $10^5$  iterations in MT chain, is less than a minute to a few minutes for each  $\gamma$  explained in the  
 136 synthetic test section below. The speed conversely depends on the number of station/components and is proportional  
 137 to the number of restrictive polarities. For example, in one of the applications below with 24 seismogram components,  
 138 14 polarities, 9261 potential sources, and the starting point at the farthest corner of the location grid, the time is about  
 139 3.5 minutes. Without the constraints the time may increase even to hours.

### 140 141 3 Synthetic test 142

143 We perform several synthetic tests to confirm the validity of the method. The configuration of the stations in the  
 144 synthetic tests is identical to the recording stations of Sargans earthquakes used also as an application (Fig. 1).  
 145 The elements of MT in NED coordinate system used are as follows:  $m_{xx} = -2.7645\text{e}+16$ ,  $m_{yy} = 3.2959\text{e}+15$ ,  $m_{zz} =$   
 146  $2.4349\text{e}+16$ ,  $m_{xy} = 1.1381\text{e}+18$ ,  $m_{xz} = 1.8408\text{e}+17$ ,  $m_{yz} = 3.6964\text{e}+17$ , with about 86%, 14% and 0%, DC, CLVD  
 147 and isotropic components. The strike, dip and rake are equal to 89.05°, 72.74° and 171.82° successively. The synthetic

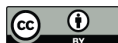

location is located at  $\mathbf{x} = (1 \text{ km N}, -1 \text{ km E}, 6 \text{ km down})$  with respect to Sargans earthquake epicenter. We used 9261 trial sources with equal step of 1 km from -10 to 10 km for horizontal coordinates and between 1 and 21 km for depth. The results with different Signal-to-noise ratio (SNR) are shown in Table 1-3. SNR is here defined as the power of signal divided by the power of white noise. A Butterworth filter with the frequency range 0.02 - 0.15 Hz is applied to both the noise and synthetic data. The inversion is performed with the same velocity model as used to produce the synthetic data. In the tables, beachballs of the solutions (in red) are illustrated with the true mechanism used for creating synthetic seismograms in green color. Kagan angles (Kagan, 1991) are the angles of rotation between two nodal planes of the solutions and the true mechanism. In Table 1 we utilize all stations in the inversion while in Tables 2 and 3 we just used two nearby stations, LIENZ and SGT04. Table 2 and 3 differ in using the constraints of polarity and DC% > 70 in Table 2. The results presented in Table 1 and Table 2 are more close to each other; although in the latter, we just used two stations. On the other hand, the results in Table 3 shows that the solutions deteriorate more, in terms of Kagan angles and deviatoric part due to the lack of polarity and DC% constraints. For example, for SNR equal to 0.5, Kagan angle is  $8^\circ$ , in case of applying the constraints, while it increases to  $30^\circ$  otherwise. For the case of using all stations, we calculate the location as model parameter (Table 1) while for two-station cases we fix the location to the one obtained for all-station computation (Table 2 and 3).

The outer chain consists of drawing samples by the adaptive Metropolis method and calculating the marginal posterior probability for any given location and performing the acceptance test which is a Metropolis test. The iteration is repeated for 1000 times, however after few hundred steps, the optimum location is found. In the synthetic test without noise, 38 iterations were enough for location parameters to converge. Similar to Mustač and Tkalčić (2016) the visited potential locations, as well as the accepted location solution with the increasing likelihood and the optimum one are shown in Fig. 2. Both the 3D and 2D views are illustrated. The starting search point is  $\mathbf{x} = (0, 0, 10)$  representing the beginning of the lines connecting the accepted solutions; finally ending with the maximum a posteriori solution encircled by green squares in 2D views. In 3D view, the accepted Metropolis locations are drawn by green cubes. As is presented in the figure, the concentration of high probability sites (larger cubes and squares) are around the optimum solution, and the accepted solutions find their ways around it.

We applied the posterior coarsening method introduced by Miller and Dunson (2015) to reduce the sensitivity of  $\mathbf{x}$  to noise. If the dataset is large, the marginal likelihood value changes substantially for small variations of  $\mathbf{x}$ . A coarsened marginal posterior probability distribution can remedy the problem, which is raising the marginal likelihood to the power of  $1/\gamma$  with  $\gamma > 1$  (Eq. (3)).

$$\sigma_\gamma(\mathbf{d}|\mathbf{x}) := (\sigma(\mathbf{d}|\mathbf{x}))^{1/\gamma} \quad (3)$$

$\sigma_\gamma(\mathbf{d}|\mathbf{x})$  is more flat for larger  $\gamma$  and data cannot constrain source location, on the other hand, for small  $\gamma$ ,  $\sigma_\gamma(\mathbf{d}|\mathbf{x})$  causes the posterior on  $\mathbf{x}$  to be limited to a few values. The former causes the marginal posterior distribution of  $\mathbf{x}$  to degenerate to the prior, and the latter situation is susceptible to noise (Gu et al., 2018). That is why the adjustment of  $\gamma$  is necessary, especially for obtaining optimum depth; the horizontal source coordinates are less sensitive to the noise. For investigating source location variation, we plot the mean of MCMC trace versus  $\gamma$  (Fig. 3). The calculations

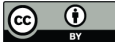

are performed for two cases, one in which starting point is near to the synthetic data source location (Fig.3, left panel) and the other with starting point in the place of the farthest location node of the  $20 \times 20 \times 20$  km grid (Fig. 3, right panel). For both of the cases, SNR is 2. In the former situation the mean equals to the input location for all values of low  $\gamma$ . Especially for horizontal coordinates of the location; the means do not change for  $\gamma$  up to 300, while the depth is more sensitive to the value. In the latter condition we have much longer burn-in period that are discarded before plotting. The source location lastly reaches the correct input location, but there is a value of  $\gamma$  below which the range begin to shrink and the curves of source location range versus  $\gamma$  show trends. This value can be chosen as the optimum values of  $\gamma$  shown by the black circles. For this case this optimum value is 50. The figures also illustrate the standard deviations by gray shaded error bars (Campbell, 2009) which show the increment for larger  $\gamma$ s. That is due to more flat  $\sigma_\gamma(d|x)$  and failure of data to constrain  $x$  that is visible in the plot of vertical coordinate of the location, but happens also for horizontal coordinates for higher  $\gamma$ s than 300 (not shown in the figures). Figure 4 shows the random walk in the focal angles' solution space utilizing all stations with no usage of noise (first row in Table 1). The strikes, dips and rakes are calculated from the actual random walk in MT space. For simplicity we only show the search in focal angles' space. The unvisited sites are shown by gray color and low and high probability areas are depicted by a range of hot pallet colors from white to black. The start and end of the overall search are illustrated by the green arrow and circle, respectively. The green lines show the path of all accepted focal angles for all accepted locations. The total number of tested sites are  $10^5$ , however in the figure we only demonstrate the proposed and accepted sites which pass through the test of polarity and DC% in terms of the value of PPD. The accepted focal angles and the relevant path for all accepted trial locations are shown by green circles and lines. There are six accepted locations with the increasing likelihood out of 1000 tested locations.

#### 4 Application

We present the results of applying the method on two small ( $M_w$  3.6 and 3.8) events with available independent focal mechanism solutions. The first earthquake, which was also used in the synthetic tests above, is a Switzerland event near Lichtenstein border. The second one is an Iranian event happened near the capital, Tehran, called Malard earthquake.

##### 4.1 Sargans Earthquake

The first earthquake is an  $M_w$  3.6 earthquake at Sargans, Switzerland which happened on December 27, 2013 at 07:08:28 UTC. Figure 1 shows the reference DC solution retrieved by Bayesian ISOLA (Vackář et al., 2017) with the mechanism, strike, dip and rake equal to  $91/183, 78/79$  and  $169/12$ . We use 14 first-motion polarities to constrain the solution resulted from broadband station inversion including the polarities of four other stations: GEA0, INS7, TMO20 and TMO22, not shown on Fig. 1 due to their larger epicentral distances comparing to the other illustrated stations. Firstly, we test the method using all stations and all polarities. We filtered the records in frequency range 0.02 to 0.15 Hz by Butterworth filter and inverted in the displacement domain. The results are presented in Fig. 5 to 10 and Table 4. Figure 5 shows the tested locations for 1000 iterations.



221 The selected  $\gamma$  for Sargans earthquake is 35 (Fig. 6). Actually, there is a range of values that gives identical location  
 222 solution beginning from  $\gamma = 1$ . Sargans earthquake does not show the shrinkage part even with the starting point in  
 223 the left top most corner of the location grid, that is, away from the optimum source location. Again the calculations is  
 224 performed after discarding the burn-in samples and the full source location range is the box with vertices  $\mathbf{x} = (-10, -$   
 225  $10, 1)$  and  $\mathbf{x} = (10, 10, 21)$ , with 9261 trial source positions.

226 Figure 7 is an illustration of the inner chain searching for optimum MT for any accepted solution. From among  $10^5$   
 227 tested moment tensors for each given location only 638 sites go through the CPU intensive synthetic seismograms  
 228 calculations due to polarity and DC% test. For example, for the last and optimum source location, there are 149 MT  
 229 sites in this event.

230 As an example, all visited focal angles and accepted solutions with higher likelihood for LIENZ and SGT04 stations  
 231 inversion are shown in Fig. 8. In two-station calculations, the location is fixed to the estimated value of all-station  
 232 result, therefore Fig. 8 contains less visited sites.

233 The DC solution of Sargans earthquake is a strike-slip mechanism. It is obtained for full  $\mathbf{C}_D$ , that is, considering both  
 234 data and theoretical uncertainties and in the displacement domain (Fig. 9). For this event data uncertainty is dominant  
 235 over the Green function uncertainty. The waveform comparisons are illustrated for standardized data, that is, original  
 236 waveforms multiplied by Cholesky decomposition of the  $\mathbf{C}_D$  (Fig. 10). Covariance matrix plays the role of automatic  
 237 frequency filter reducing the effect of noisy part of the spectrum, thus improving the result (Vackář, et al., 2017).  
 238 Variance reductions is 0.82 and strike, dip and rake are, 88/180, 80/80 and 170/10 with the magnitude of  $M_w$  3.6. That  
 239 is in comparison with inverting without covariance matrix or with the diagonal one whose elements are chosen to be  
 240 the mean squared value of the waveforms with calculated variance reduction of 0.57. The event is a shallow earthquake  
 241 with estimated 6 km hypocentral depth and horizontal shift of 0.5 and 1 km to the north and west of the epicenter.

242 Table 4 contains the result of the inversion for two- and one-station. Only two nearby stations are used and both of  
 243 the solutions with and without the constraints of polarity and DC% are determined. The first row of the table contains  
 244 the result of the inversion using all stations (red nodal lines) with the solution of Bayesian ISOLA also depicted in  
 245 green. Kagan angle in the first row is the comparison made with Bayesian ISOLA solution, but other angles are  
 246 determined in comparison with our own all-station solution. Although the two-station no-constraints DC solutions are  
 247 better in terms of Kagan angle but deviatoric solutions deteriorate. One-station results become worse both in regard  
 248 to Kagan angle and deviatoric part of the MT. Overall, as is the case with synthetic tests, polarity and DC% constraint  
 249 can help to obtain better results when using lower number of stations.

250

## 251 4.2 Malard earthquake

252 Here we apply the method on the second event happened around the town of Malard near Tehran, Iran, with  $M_w$  3.8,  
 253 on December 26, 2017 at 21:24:34 UTC (Fig 11). The reference solution of this event is our solution, that is, the  
 254 result of inversion by ISOLA (Zahradník, and Sokos, 2019) utilizing all shown stations that resulted in strike, dip and  
 255 rake equal to 24/118, 56/83 and -7/-145.

256 Figure 12 shows the plot of source location versus  $\gamma$  for Malard earthquake. The chosen  $\gamma$  is 10 and the source location  
 257 found is  $\mathbf{x} = (-1, 4, 12)$ , which is near to the location found by ISOLA using all stations, that is  $\mathbf{x} = (-3, 3, 11.8)$ . The





north-east horizontal location have a small shrinkage part, while it does not exist for east-west location. The shrinking stage is longer for the vertical component of the location. The lack of shrinking stage for Sargans earthquake and its existence for Malard event could be due to higher level of noise in case of Malard event and the low number of station-components used for its calculation.

In order to apply the method on this earthquake, we utilize 21 first-motion polarities from broadband and short-period records. The observed seismograms of HSB, VRN, JIR1, FIR and QSDN stations are filtered to frequency ranges 0.04-0.17, 0.04-0.08, 0.055-0.085, 0.055-0.085 and 0.055-0.08 to gain better waveform fit (Variance reduction = 0.79). The resulted strike, dip and rake are 26/119, 58/84 and -7/-148 (Fig 13).

We also determine two- and one-station solutions for this event. The results for this event show the advantage of the constraints of polarity and DC% again. Of course, for all the cases, only one polarity is enough to constrain the solution to the optimum solution. That is except in the case of using the single station of VRN, in which more polarity constraints are needed for better compatibility with all station solution.

270

## 271 5 Conclusion

We employed Bayesian framework using an MCMC algorithm to retrieve full moment tensor and source location of earthquakes by applying the constraints of polarity and DC%. The results show that the constraints can help to obtain better results in case of restricting the number of broadband stations to two or one. This is helpful, for example, when many short-period stations and therefore many polarities are available but the broadband network is sparse. The obtained results indicate that despite the low magnitude of the selected earthquakes, the employed approach could be reliable for retrieving location and moment tensors. The study added some methodical insights to the broad suite of similar methods including the two chain approach used comprising Metropolis-Gibbs Sampling algorithm and the coarsened likelihood for the parameter of source location.

280

## 281 Data availability

The data used in this study are freely available from Switzerland (Swiss Seismological Service (SED) at ETH Zürich 1983), ZAMG (Vienna), International Institute of Earthquake Engineering and Seismology (IIEES) and Iranian Seismological Center (IRSC) of Institute of Geophysics, University of Tehran.

285

## 286 Author contribution

M. Pakzad developed the code, did the synthetic tests and prepared the manuscript. M. Khalili performed the calculations of Sargans earthquake and helped making the figures. Sh. Vahidravesh performed the calculations of the Malard earthquake and helped making the figures.

290

## 291 Acknowledgments

Data used in the study is from Switzerland (Swiss Seismological Service (SED) at ETH Zürich 1983), ZAMG (Vienna), International Institute of Earthquake Engineering and Seismology (IIEES) and Iranian Seismological Center (IRSC) of Institute of Geophysics, University of Tehran.



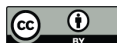

295

## 296 References

- 297 Brillinger, D.R., Udias, A. and Bolt, B.A.: A probability model for regional focal mechanism solutions, B SEISMOL  
 298 SOC AM. 70 (1): 149–170, 1980.
- 299 Fojtíková, L. and Zahradník, J.: A new strategy for weak events in sparse networks: The first-motion polarity  
 300 solutions constrained by single-station waveform inversion, SEISMOL RES LETT: 85(6), 1265-1274.  
 301 <https://doi.org/10.1785/0220140072>, 2014.
- 302 Fox, C. & Norton, R.A.: Fast sampling in a linear-Gaussian inverse problem, SIAM/ASA J. Uncertainty.  
 303 Quantification, 4, 1192–1218. <https://doi.org/10.1137/15M1029527>, 2015.
- 304 Gu, C., Marzouk, Y.M. and Toksöz, M.N.: Waveform-based Bayesian full moment tensor inversion and uncertainty  
 305 determination for the induced seismicity in an oil/gas field, GEOPHYS J INT, 212(3), 1963-1985.  
 306 <https://doi.org/10.1093/gji/ggx517>, 2018.
- 307 Hallo, M. and Gallovič, F.: Fast and cheap approximation of Green function uncertainty for waveform-based  
 308 earthquake source inversions, GEOPHYS J INT, 207(2), 1012-1029. <https://doi-org.eres.qnl.qa/10.1093/gji/ggw320>,  
 309 2016.
- 310 Hallo, M., Asano, K. and Gallovič, F.: Bayesian inference and interpretation of centroid moment tensors of the 2016  
 311 Kumamoto earthquake sequence, Kyushu, Japan, EARTH PLANETS SPACE, 69(1), p.134.  
 312 <https://doi.org/10.1186/s40623-017-0721-4>, 2017.
- 313 Haario, H., Saksman, E. & Tamminen, J.: An adaptive metropolis algorithm, BERNOULLI, 7, 223–242.  
 314 <https://doi.org/10.2307/3318737>, 2001.
- 315 Ito, T., Gunawan, E., Kimata, F., Tabei, T., Meilano, I., Agustan, Ohta, Y., Ismail, N., Nurdin, I., Sugiyanto, D.: Co-  
 316 seismic offsets due to two earthquakes (Mw 6.1) along the Sumatran fault system derived from GNSS measurements,  
 317 EARTH PLANETS SPACE 68, 57, <http://dx.doi.org/10.1186/s40623-016-0427-z>, 2016.
- 318 Kagan, Y.Y.: 3-D rotation of double-couple earthquake sources, GEOPHYS J INT, 106(3), 709-716,  
 319 <https://doi.org/10.1111/j.1365-246X.1991.tb06343.x>, 1991.
- 320 Campbell, R., 2009: Shaded error bars (<https://github.com/raacampbell/shadedErrorBar>), MATLAB Central File  
 321 Exchange, last access: 1 October 1, 2019.
- 322
- 323 Li, J., Zhang, H., Sadi Kuleli, H. and Nafi Toksoz, M.: Focal mechanism determination using high-frequency  
 324 waveform matching and its application to small magnitude induced earthquakes, GEOPHYS J INT, 184(3), 1261-  
 325 1274, <https://doi.org/10.1111/j.1365-246X.2010.04903.x>, 2011.
- 326 Lomax, A. and Curtis, A.: Fast, probabilistic earthquake location in 3D models using oct-tree importance sampling.  
 327 In Geophys. Res. Abstr, Vol. 3, 955, 2001.
- 328 Lomax, A., Virieux, J., Volant, P. and Berge-Thierry, C.: Probabilistic earthquake location in 3D and layered models.  
 329 In Advances in seismic event location, 101-134, SPRINGER, Dordrecht, [https://doi.org/10.1007/978-94-015-9536-](https://doi.org/10.1007/978-94-015-9536-0_5)  
 330 [0\\_5](https://doi.org/10.1007/978-94-015-9536-0_5), 2000.
- 331 Mao, W.J., Panza, G.F. & Suhadolc, P.: Linearized waveform inversion of local and near-regional events for source  
 332 mechanism and rupturing processes, GEOPHYS J INT, 116, 784–798, [https://doi.org/10.1111/j.1365-](https://doi.org/10.1111/j.1365-246X.1994.tb03296.x)  
 333 [246X.1994.tb03296.x](https://doi.org/10.1111/j.1365-246X.1994.tb03296.x), 1994.
- 334 Miller, J.W. and Dunson, D.B.: Robust Bayesian inference via coarsening, J AM STAT ASSOC, 1-13,  
 335 <https://doi.org/10.1080/01621459.2018.1469995>, 2018.

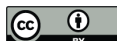

- 336 Mustač, M. & Tkalčić, H.: Point source moment tensor inversion through a Bayesian hierarchical model, *GEOPHYS*  
 337 *J INT*, 204(1), 311–323, <https://doi.org/10.1093/gji/ggv458>, 2016.
- 338 Šílený, J., Panza, G.F. & Campus, P.: Waveform inversion for point source moment tensor retrieval with variable  
 339 hypocentral depth and structural model, *GEOPHYS J INT*, 109, 259–274, [https://doi.org/10.1111/j.1365-](https://doi.org/10.1111/j.1365-246X.1992.tb00097.x)  
 340 [246X.1992.tb00097.x](https://doi.org/10.1111/j.1365-246X.1992.tb00097.x), 1992.
- 341 Stähler, S. and Sigloch, K.: Fully probabilistic seismic source inversion-Part 1: Efficient parameterization, *SOLID*  
 342 *EARTH*, (2), 1055–1069, <https://doi.org/10.5194/se-5-1055-2014>, 2014.
- 343 Swiss Seismological Service (SED) at ETH Zürich: National Seismic Networks of Switzerland; ETH Zürich,  
 344 <https://doi.org/10.12686/sed/networks/ch>, 1983.
- 345 Vackář, J., Gallovič, F., Burjánek, J., Zahradník, J., & Clinton, J.: Bayesian ISOLA: New tool for automated centroid  
 346 moment tensor inversion, *GEOPHYS J INT*, 210(2), 693–705, <https://doi.org/10.1093/gji/ggx158>, 2017.
- 347 Walsh, D., Arnold, R. and Townend, J.: A Bayesian approach to determining and parametrizing earthquake focal  
 348 mechanisms, *GEOPHYS J INT*, 176(1), 235–255, <https://doi.org/10.1111/j.1365-246X.2008.03979.x>, 2009.
- 349 Wéber, Z.: Probabilistic local waveform inversion for moment tensor and hypocentral location, *GEOPHYS J INT*,  
 350 165, 607–621, <https://doi.org/10.1111/j.1365-246X.2006.02934.x>, 2006.
- 351 Wéber, Z.: Estimating source time function and moment tensor from moment tensor rate functions by constrained L1  
 352 norm minimization, *GEOPHYS J INT*, 178, 889–900, <https://doi.org/10.1111/j.1365-246X.2009.04202.x>, 2009.
- 353 Wéber, Z.: Probabilistic joint inversion of waveforms and polarity data for double-couple focal mechanisms of local  
 354 earthquakes, *GEOPHYS J INT*, 213(3), 1586–1598, <https://doi.org/10.1093/gji/ggv096>, 2018.
- 355 Tarantola, A.: *Inverse Problem Theory*, ELS. ISBN 9780444599674, 1987.
- 356 Zahradník, J., Sokos, E.N.: ISOLA code for multiple-point source modeling – review, in: *Moment Tensor Solutions -*  
 357 *A Useful Tool for Seismotectonics*, edited by: D'Amico S., Springer, Berlin, Heidelberg, Germany,  
 358 <https://doi.org/10.1007/978-3-319-77359-9>, 2019.

359  
 360  
 361  
 362  
 363  
 364  
 365  
 366  
 367  
 368  
 369  
 370  
 371  
 372  
 373

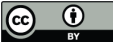

374

375

376

377

378

**Table 1:** Results of the synthetic tests with different SNR using all stations. The plots are equal-area Lambert-Schmidt projections, lower hemisphere with compressional and dilatational polarities, in black and white respectively. The compressional quadrants are shaded. The input focal mechanism nodal lines are in green and the solutions' nodal lines are in red. VR stands for variance reduction.

| Data                                      | SNR      | Strike (°) | Dip (°) | Rake (°) | DC% | CLVD% | VR    | Kagan angle (°) | DC plot                                                                               | Deviatoric plot                                                                       |
|-------------------------------------------|----------|------------|---------|----------|-----|-------|-------|-----------------|---------------------------------------------------------------------------------------|---------------------------------------------------------------------------------------|
| All stations With polarities and DC% > 70 | No noise | 87/179     | 75/83   | 173/15   | 76  | 19    | 0.99  | 4               |    |    |
|                                           | 1.0      | 84/177     | 67/82   | 171/23   | 85  | 10    | 0.60  | 8               |    |    |
|                                           | 0.5      | 82/177     | 65/81   | 170/26   | 79  | 8     | 0.25  | 10              |   |   |
|                                           | 0.1      | 332/112    | 60/37   | -67/-124 | 87  | 12    | 0.005 | 63              |  |  |

379

380

381

382

383

384

385

386

387

388

389

390

391

392

393

394

395

396



397

398 **Table 2: Mechanisms obtained using different SNR applied to the synthetic data. Only two stations (LIENZ and SGT04)**  
 399 **are used in the inversion. The source is fixed to the one obtained in all stations computation.**

| Data                                       | SNR      | Strike (°) | Dip (°) | Rake (°) | DC% | CLVD% | VR    | Kagan angle (°) | DC plot | Deviatoric plot |
|--------------------------------------------|----------|------------|---------|----------|-----|-------|-------|-----------------|---------|-----------------|
| LIENZ + SGT04 With polarities and DC% > 70 | No noise | 86/179     | 69/84   | 173/21   | 73  | 3     | 0.99  | 5               |         |                 |
|                                            | 1.0      | 81/176     | 71/77   | 167/19   | 86  | 14    | 0.58  | 8               |         |                 |
|                                            | 0.5      | 81/176     | 71/77   | 167/19   | 86  | 14    | 0.24  | 8               |         |                 |
|                                            | 0.1      | 322/151    | 57/33   | -95/-83  | 73  | 12    | 0.008 | 85              |         |                 |

400

401

402 **Table 3: Results of the same inversion as in Table 2, but no polarity or DC% constraints are employed. The source is fixed**  
 403 **to the one obtained in all stations computation.**

| Data                                          | SNR      | Strike (°) | Dip (°) | Rake (°) | DC% | CLVD% | VR   | Kagan angle (°) | DC plot | Deviatoric plot |
|-----------------------------------------------|----------|------------|---------|----------|-----|-------|------|-----------------|---------|-----------------|
| LIENZ + SGT04 Without polarities and free DC% | No noise | 87/180     | 72/80   | 170/18   | 89  | 4     | 0.99 | 2               |         |                 |
|                                               | 1.0      | 79/180     | 63/70   | 157/29   | 72  | 6     | 0.59 | 17              |         |                 |
|                                               | 0.5      | 66/175     | 55/65   | 149/40   | 49  | 9     | 0.27 | 30              |         |                 |
|                                               | 0.1      | 39/152     | 56/59   | 142/40   | 48  | 1     | 0.03 | 48              |         |                 |

404



Table 4: Moment tensor solutions using different data sets employing full  $C_D$  for Sargans earthquake. The first row is the reference solution of Fig. 9 resulting from the inversion of all stations with polarity and DC% constraints. Two-station solutions are close to the reference one in terms of deviatoric mechanism. Two datasets of LIENZ + SGT04 and SGT04 + PANIX show identical DC solution to the reference result. That is while the one-station dataset mechanisms are often badly estimated.

|                                 | Data               | Strike (°) | Dip (°) | Rake (°) | DC% | CLVD% | $M_w$ | VR   | Kagan angle (°) | DC plot | Deviatoric plot |
|---------------------------------|--------------------|------------|---------|----------|-----|-------|-------|------|-----------------|---------|-----------------|
| With polarities and DC% > 70    | Reference (Fig. 9) | 88/180     | 80/80   | 170/10   | 72  | 13    | 3.7   | 0.82 | 4               |         |                 |
|                                 | LIENZ + SGT04      | 80/178     | 63/74   | 163/28   | 71  | 25    | 3.6   | 0.80 | 19              |         |                 |
|                                 | SGT04 + PANIX      | 272/180    | 83/71   | -161/-8  | 77  | 21    | 3.6   | 0.83 | 20              |         |                 |
|                                 | LIENZ              | 272/181    | 87/80   | -170/-3  | 78  | -21   | 3.6   | 0.82 | 14              |         |                 |
|                                 | SGT04              | 80/178     | 63/74   | 163/28   | 71  | 25    | 3.6   | 0.79 | 19              |         |                 |
| Without polarities and free DC% | LIENZ + SGT04      | 92/184     | 81/77   | 166/10   | 21  | 39    | 3.8   | 0.83 | 6               |         |                 |
|                                 | SGT04 + PANIX      | 84/182     | 70/70   | 159/21   | 41  | 26    | 3.7   | 0.86 | 15              |         |                 |
|                                 | LIENZ              | 12/104     | 83/76   | 166/7    | 42  | -16   | 3.7   | 0.84 | 75              |         |                 |
|                                 | SGT04              | 82/184     | 66/64   | 151/27   | 28  | 39    | 3.6   | 0.84 | 23              |         |                 |



Table 5: Moment tensor solutions using different datasets employing full  $C_D$  for Malard earthquake. The first row is the solution considered as reference (red) shown also in Fig. 13 resulted from the inversion of five stations with polarity and DC% constraints. The green nodal lines in the rows other than the first row are the reference solution.

|                                 | Data                 | Strike (°) | Dip (°) | Rake (°) | DC% | CLVD% | $M_w$ | VR   | Kagan angle (°) | DC plot | Deviatoric plot |
|---------------------------------|----------------------|------------|---------|----------|-----|-------|-------|------|-----------------|---------|-----------------|
| With polarities and DC% > 70    | Reference<br>Fig. 13 | 26/119     | 58/84   | -7/-148  | 87  | 9     | 3.6   | 0.79 | 3               |         |                 |
|                                 | HSB + VRN            | 26/122     | 65/78   | -14/-154 | 86  | 3     | 3.7   | 0.79 | 10              |         |                 |
|                                 | VRN + JIR1           | 20/112     | 60/87   | -3/-150  | 79  | 3     | 3.7   | 0.46 | 8               |         |                 |
|                                 | HSB                  | 26/122     | 65/78   | -14/-154 | 86  | 3     | 3.7   | 0.79 | 10              |         |                 |
|                                 | VRN                  | 22/289     | 79/79   | 12/168   | 76  | 14    | 3.6   | 0.26 | 29              |         |                 |
| Without polarities and free DC% | HSB + VRN            | 28/123     | 74/73   | 162/17   | 79  | 16    | 3.7   | 0.80 | 90              |         |                 |
|                                 | VRN + JIR1           | 25/293     | 46/88   | -177/-44 | 70  | 11    | 3.7   | 0.47 | 91              |         |                 |
|                                 | HSB                  | 28/122     | 74/73   | 162/17   | 79  | 16    | 3.7   | 0.80 | 90              |         |                 |
|                                 | VRN                  | 141/324    | 61/29   | 89/93    | 10  | 88    | 3.7   | 0.46 | 95              |         |                 |

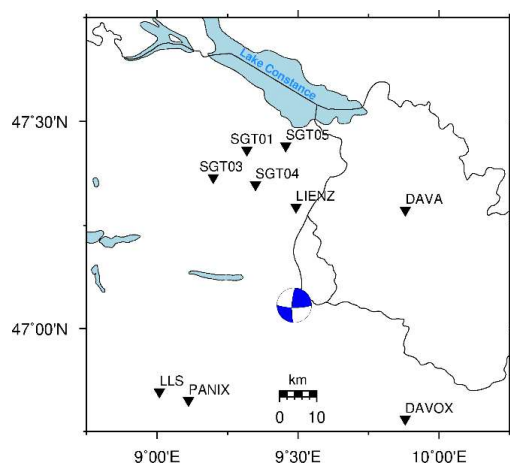

Figure 1: Map related to  $M_w$  3.6 Sargans, Switzerland earthquake, near Liechtenstein border, applied in the synthetic tests and as the method application in the following sections. The independent beachball solution (retrieved using all stations by Bayesian ISOLA (Vackář et al., 2017)) are inserted at the epicenter and the triangles indicate the station locations. Black lines show countries' borders and lake shores.



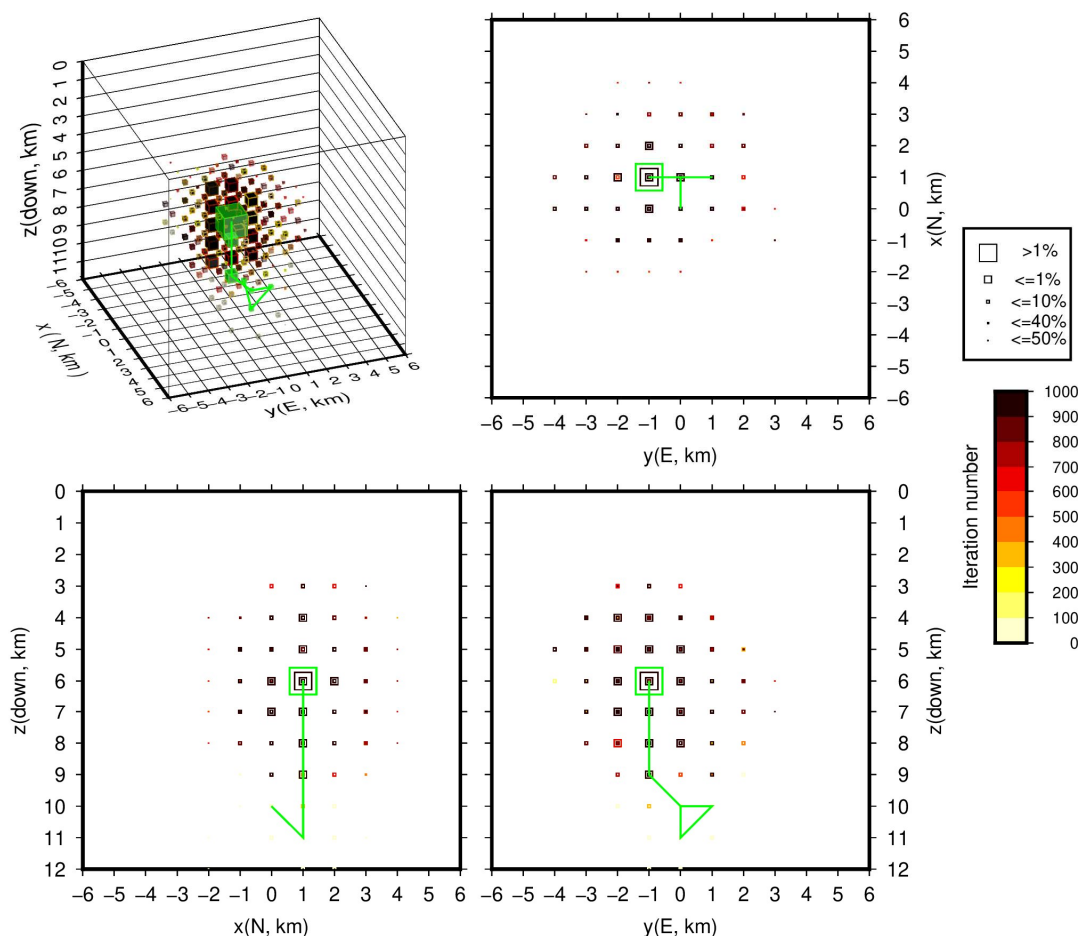

Figure 2: 1000 random walks to reach the maximum a posteriori location in three and two dimensional views for the synthetic test using all stations without noise. After 38 iterations, the walker reaches the optimum point. Cubes and squares show proposed locations colored according to their iteration number and sized in keeping with the likelihood value, that is, largest cubes and squares indicate greater than 1% maximum a posteriori location, etc. The green cubes in 3D view show the accepted movements of the walker in location space with the increasing likelihoods, with their last optimum one encircled by green squares in 2D views. There are seven accepted solutions with the increasing likelihood that their paths are shown by green lines, reaching to the input location.

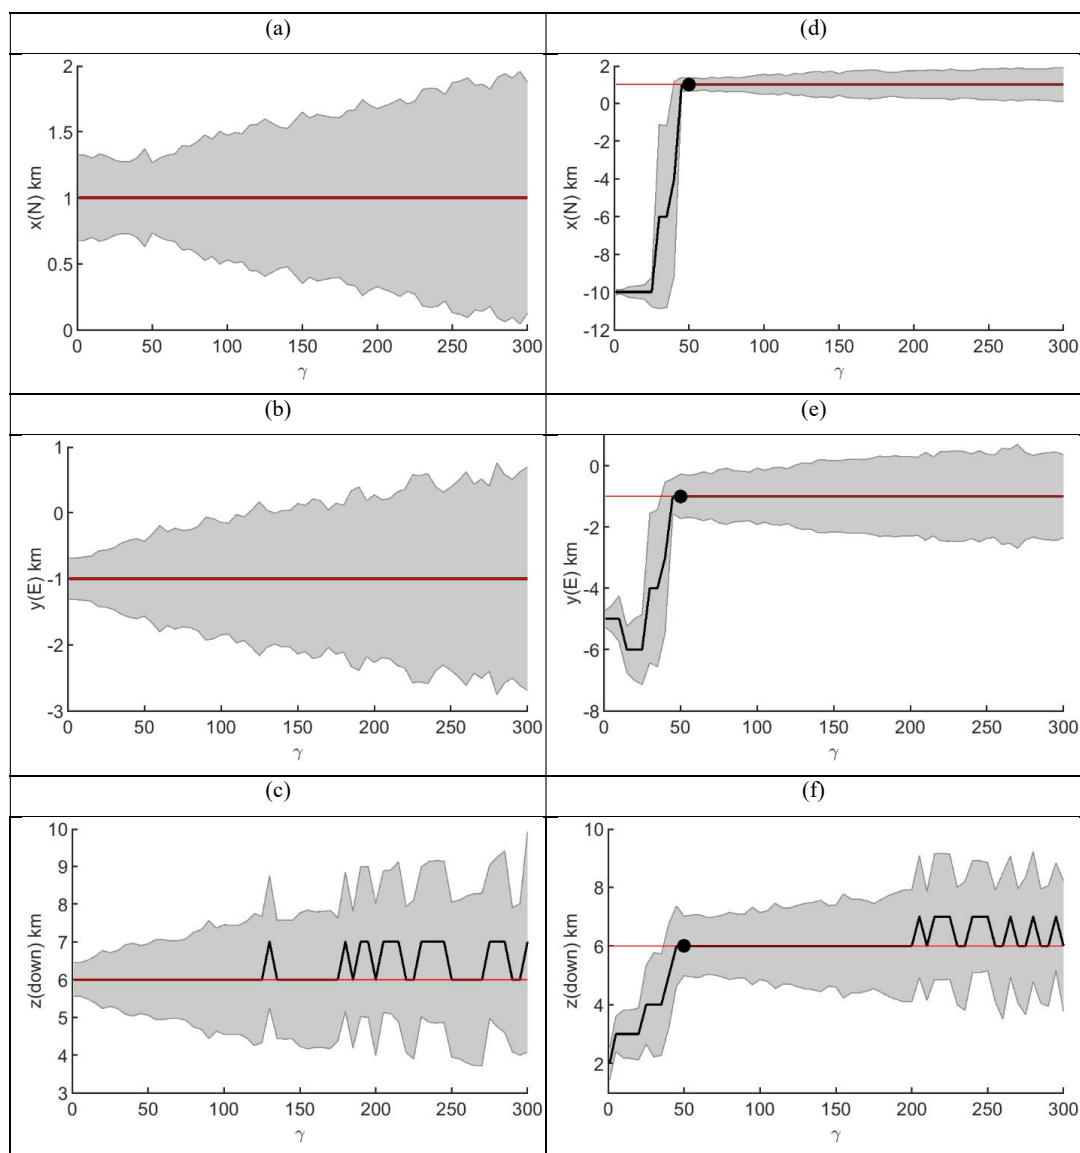

Figure 3: Source location and shaded error bars versus  $\gamma$  for SNR equal to 2.0 in the frequency range 0.02 - 0.15 Hz for the synthetic test. The source locations' ranges are the mean of MCMC traces. The standard deviations are in gray, the red line illustrate the correct input location. The source location in the left panel (a to c) belong to the calculations with the starting point  $x = (0 \text{ km N}, 0 \text{ km E}, 10 \text{ km down})$  near to the input location in the synthetic test while the right panel (d to f) shows the source locations for the farthest starting point, that is  $x = (-10, -10, 1)$ . The circle show the selected  $\gamma = 50$  for this test.

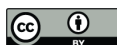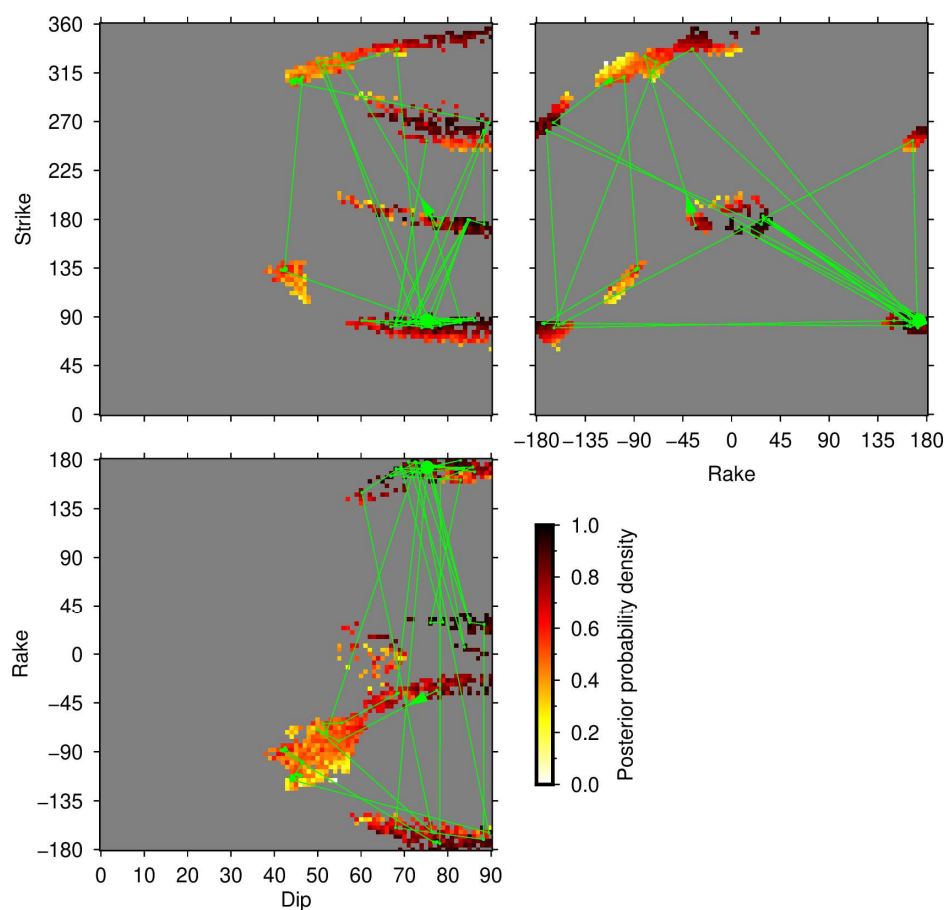

Figure 4: 2174 polarity and DC% tested focal angles out of  $10^5$  ones in the inner Markov chain shown by squares, colored according to the values of posterior probability density obtained applying all stations polarities and waveforms observed for the synthetic test with no noise. The steps belong to all six accepted source locations with the increasing likelihood in the outer location chain. The green lines demonstrate the accepted random walks. The green arrows represent the first point passing through the condition of larger likelihood; small green circles are subsequent points and finally the large green circles show the location of the optimum (maximum likelihood) focal mechanism (in total 87 sites for all accepted sources).

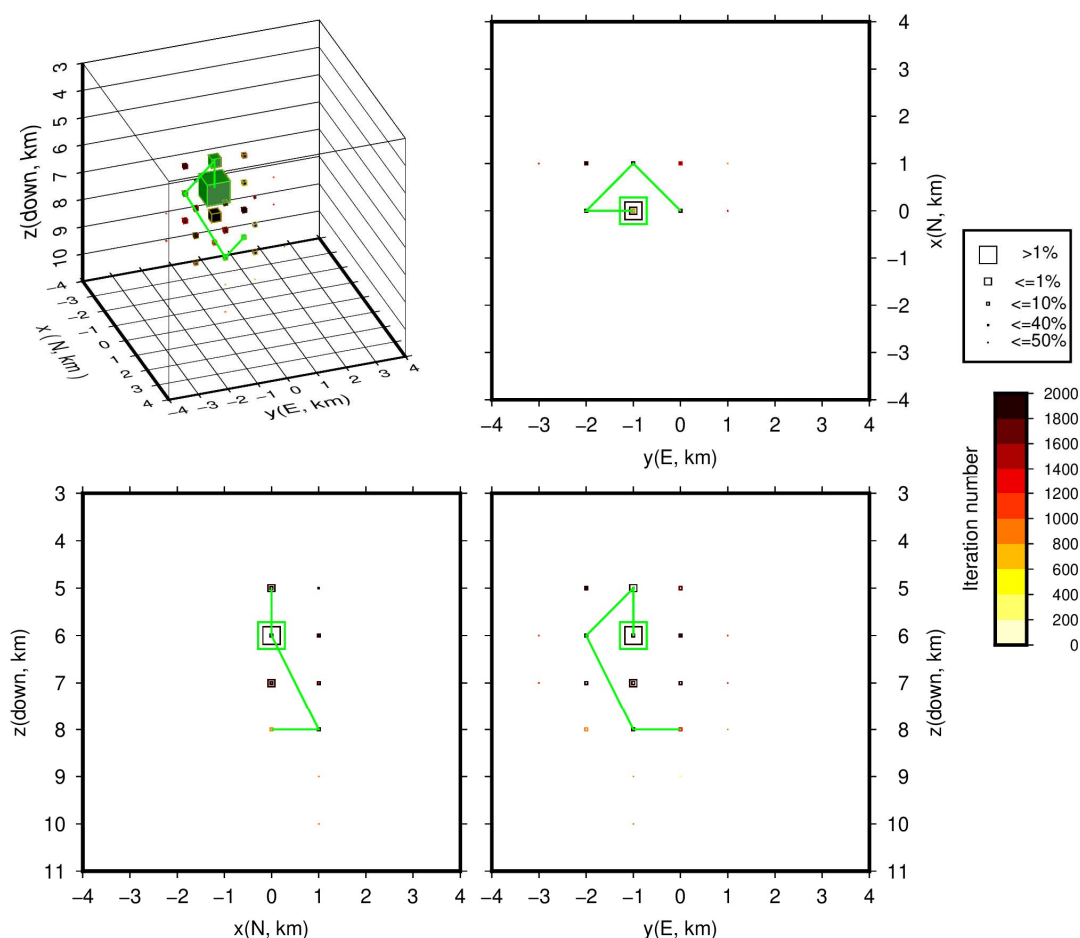

Figure 5: 409 accepted random walks to reach the maximum a posteriori location in three and two dimensional views for the inversion of Sargans earthquake data using all stations with full  $C_D$  covariance matrix. 37 out of 2000 iterations are enough to find the maximum a posteriori location. The center of the Cartesian coordinate is  $47.057^\circ\text{N}$  and  $9.486^\circ\text{E}$ . There are five accepted solutions with the increasing likelihood that their paths are shown by green lines reaching to the optimum point. For the explanations of the symbols refer to Fig. 2.

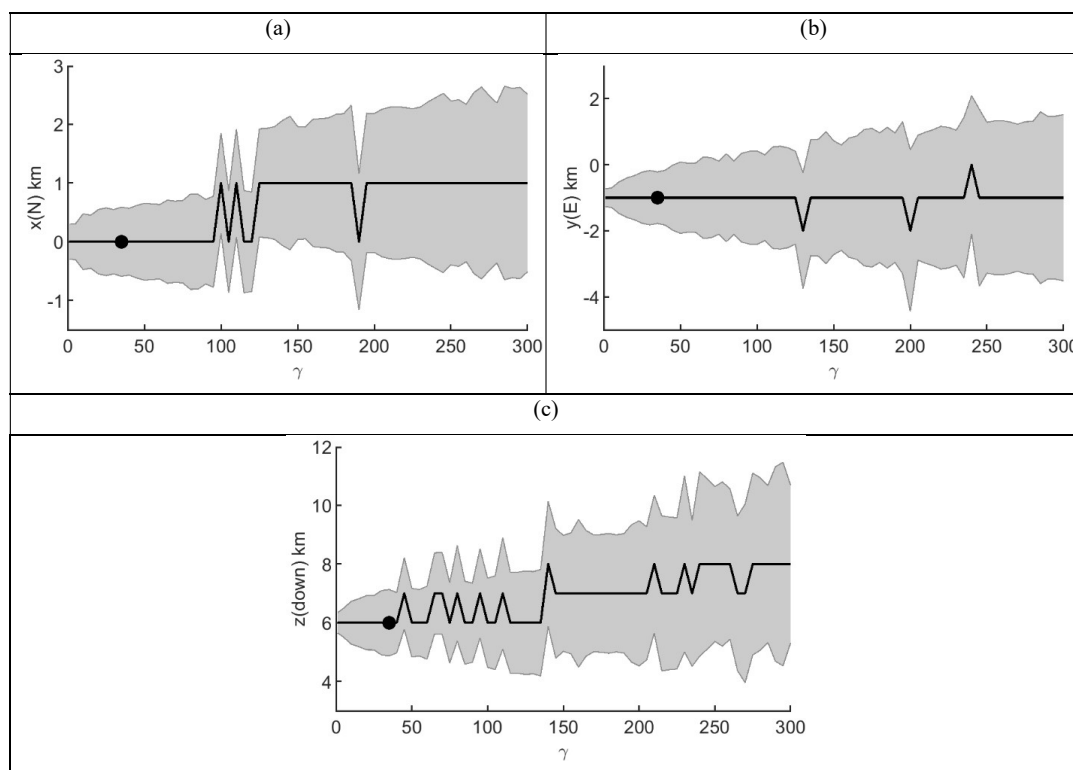

Figure 6: Source location ranges and standard deviations versus  $\gamma$  for Sargans earthquake. The source locations are the mean of MCMC trace shown in black line for each  $\gamma$  and the shaded error bars are in gray. The circle shows the selected  $\gamma$ .

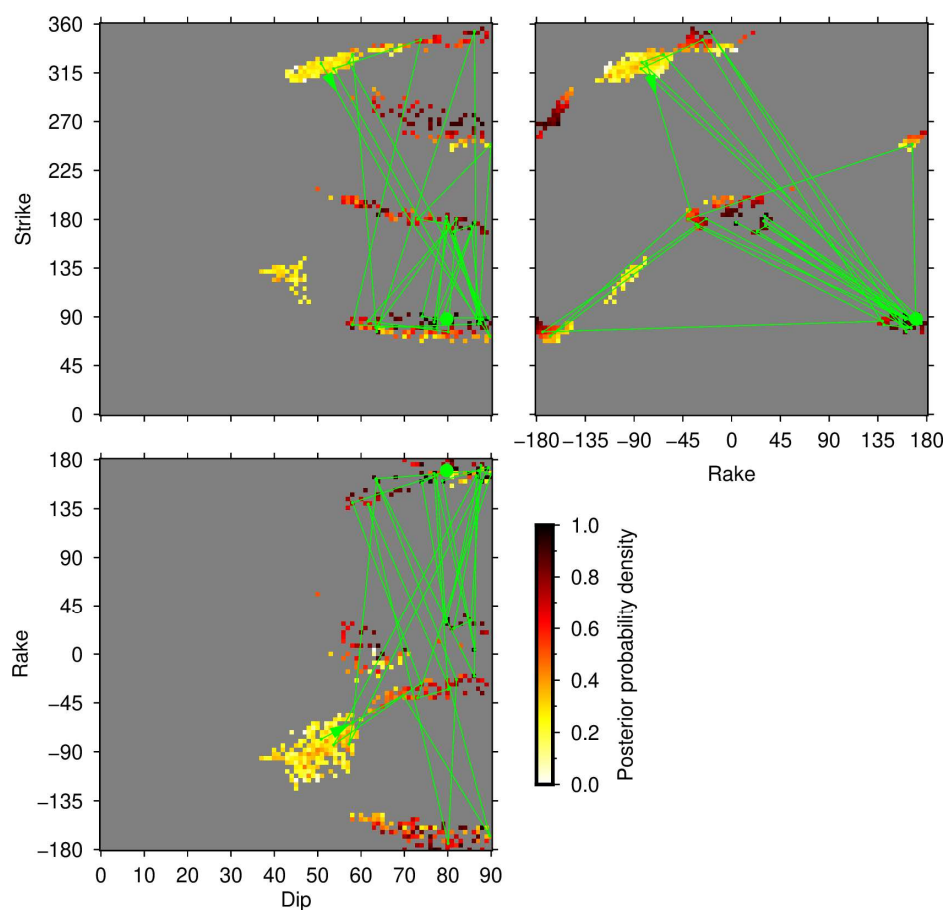

486

487

488

489

490

491

492

Figure 7: 638 visited sites on 2D square lattices of focal angles' space, searching for maximum likelihood point of the PPD which obtained using all stations polarities and waveforms observed and for a Sargans earthquake. The steps belong to all five accepted source locations in the outer chain. The data and theoretical errors are used in the inversion in the form of full  $C_D$ . There are in total 34 sites for all accepted sources. 1000 location sites and  $10^5$  MT values are polarity and DC% tested before CPU intensive synthetic seismograms calculations, leading to only 638 visited sites. For the symbols see Fig. 4.

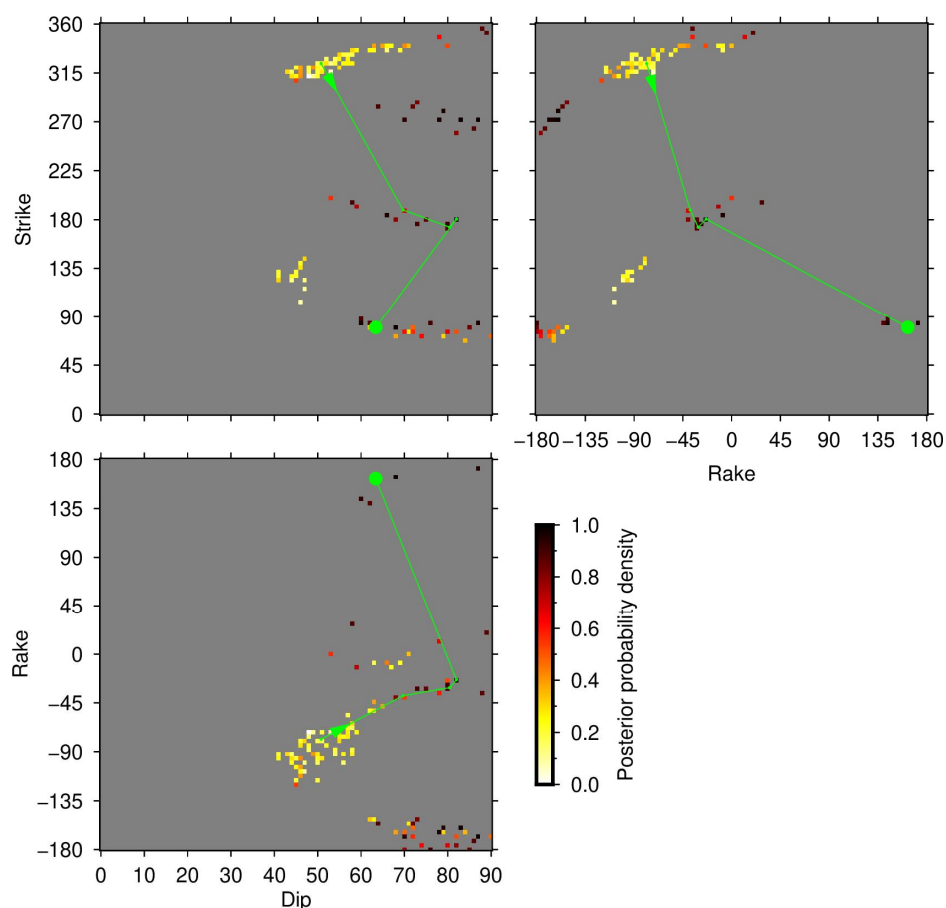

Figure 8: Random walk of 122 trial steps on 2D square lattices of focal angles' space, searching for maximum likelihood point of the posterior probability density (PPD) which obtained using all stations polarities and waveforms observed at two stations, LIENZ and SGT04, for a Sargans earthquake. The location is fixed to the one estimated from all-station calculation. The data and theoretical errors are used through the inversion in the form of full  $C_D$ . There are in total five sites with the increasing likelihood values. The location site is fixed to  $x = (0.5 \text{ km N, } -1 \text{ km E, } 6 \text{ km down})$  and  $10^5 \text{ MT}$  sites are polarity and DC% tested before CPU intensive synthetic seismograms calculations, leading to only 122 visited sites. For the symbols see Fig. 4.



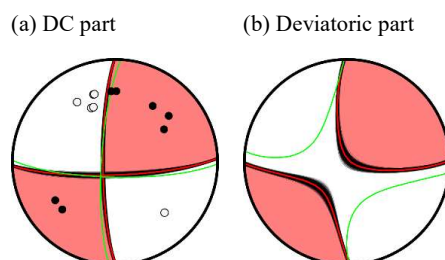

510

511

512

513

514

515

516

**Figure 9: Moment tensor solution in case of using all stations and polarities in the inversion. The inversion is performed in the displacement domain applying full covariance matrix of both data and Green functions uncertainties. The solution is shown by red nodal line; the errors are in black and the independent solution of Bayesian ISOLA (Vackář, et al., 2017) is in green. (a) DC focal mechanism solution. (b) Deviatoric part.**

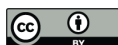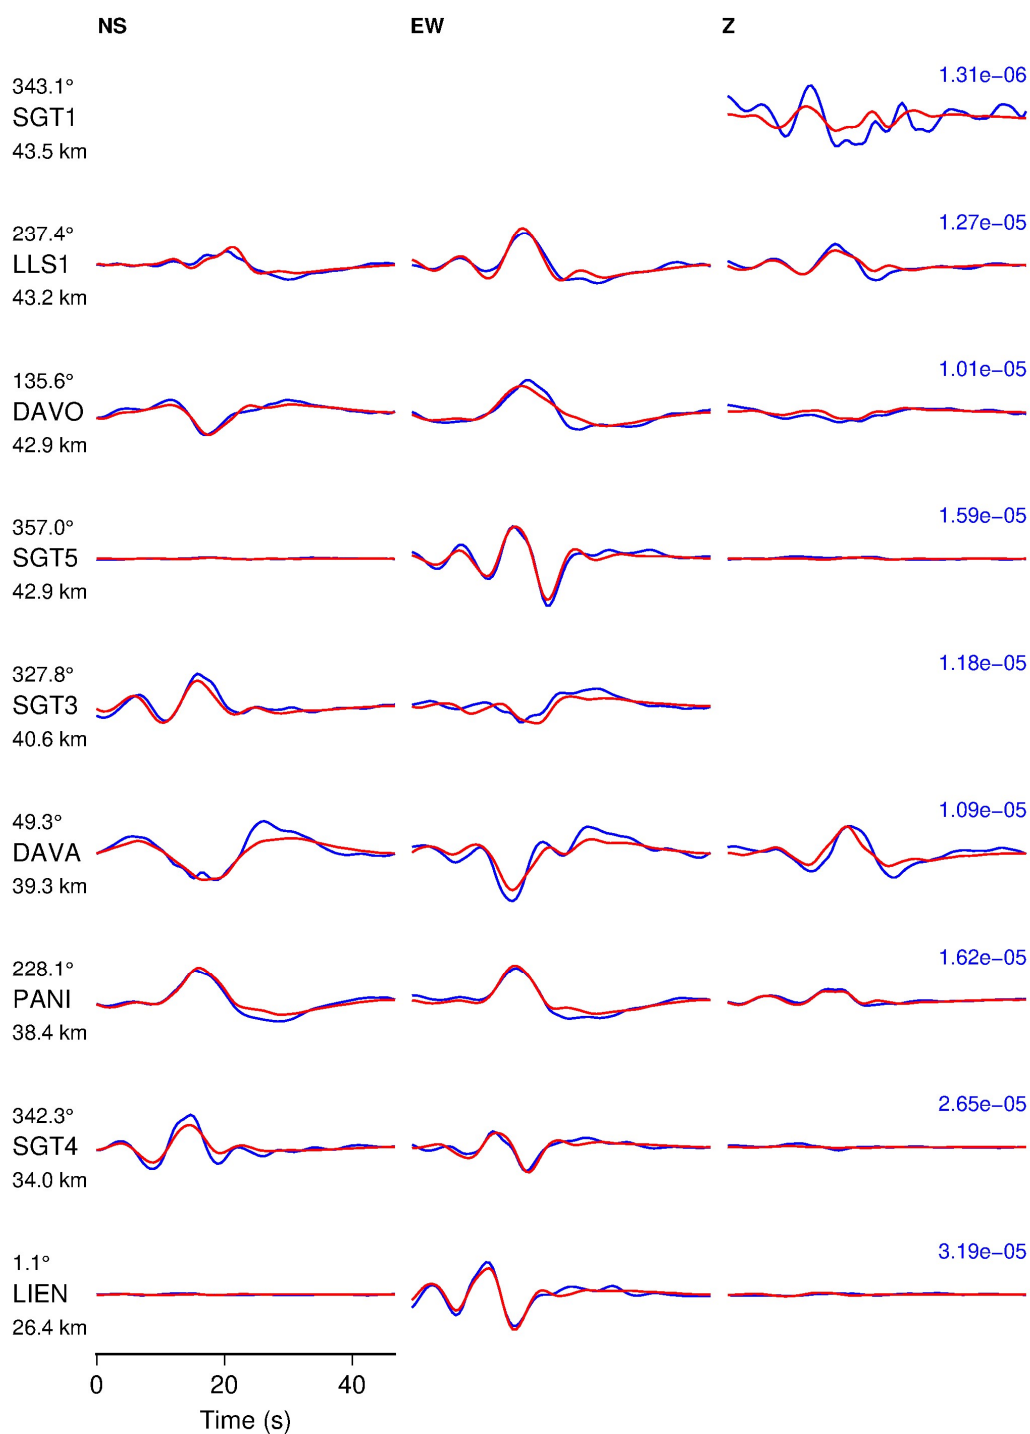



Figure 10: Comparison of standardized observed (blue) and synthetic (red) displacement seismograms using all stations and polarities in the inversion involving data and Green functions uncertainties. The waveforms are normalized by means of the largest component of each station; ~~that is, the largest component of each station is 1 and the~~ numbers on the right are the maximum amplitudes in m. The station codes, epicentral distances and azimuths are shown on the left. The variance reduction using all seismograms is 0.82.

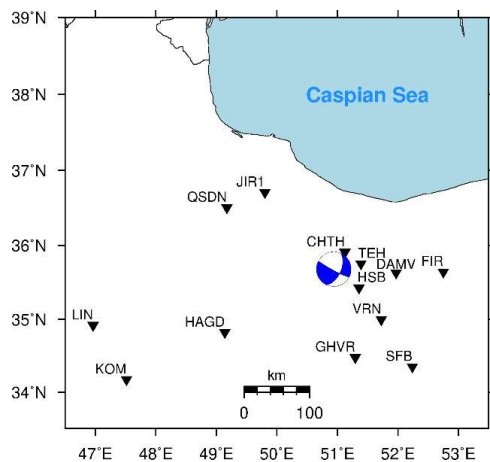

Figure 11: Map related to  $M_w$  3.8 Malard earthquake near Tehran, Iran, used as the method application. The independent beachball solution (retrieved using all stations by ISOLA) are inserted at the epicenter and the triangles show the station locations. Black lines show countries' borders and lake shores.

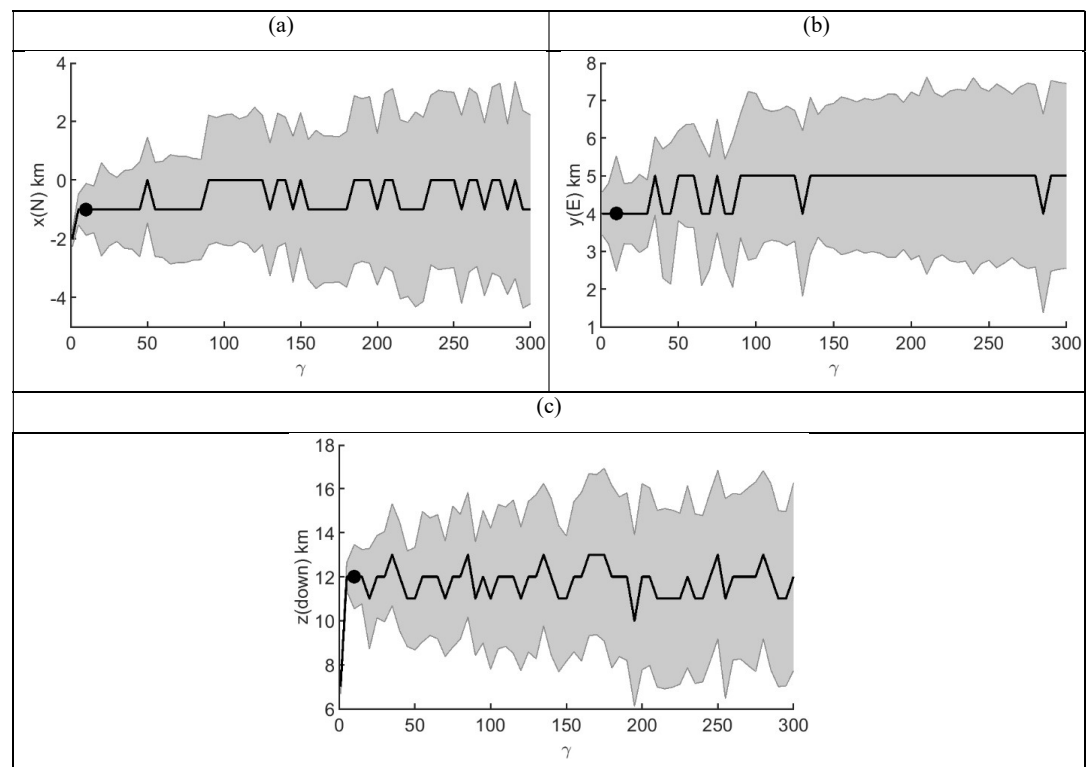

Figure 12: Source location range for different  $\gamma$ s calculated by Malard earthquake data. The filled circle illustrates the selected  $\gamma$  value for computing optimum source location.

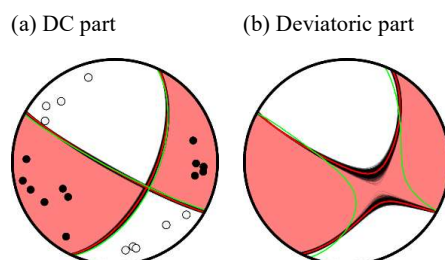

Figure 13: Focal mechanism solution of Malard earthquake obtained by five-station broadband waveform inversion with full  $C_D$ , constrained by first-motion polarities and DC% > 70 (red). The independent ISOLA solution obtained by 13 stations are illustrated in green and the errors are in black. a) DC part with polarities. b) Deviatoric part.

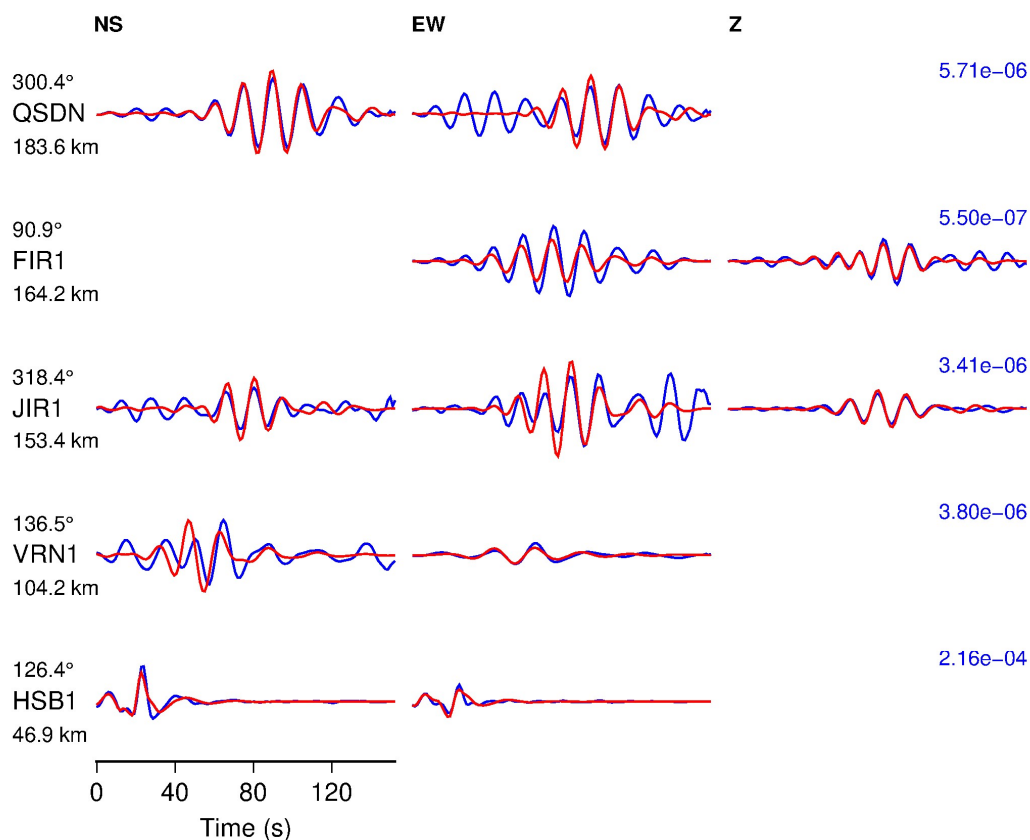

Figure 14: Observed (blue) and synthetic (red) standardized displacements for Malard earthquake. Some components are not taken into account due to unavailability. For details refer to Fig. 10.
